# Supplementary material for: From Mangrove to Fork: Metal Presence in the Guayas Estuary (Ecuador) and Commercial Mangrove Crabs
Source: MDPI journal article supplement (doi:10.3390/foods10081880), 2021-08-14
Supplement: s1 [file s1]

## Supplementary Materials

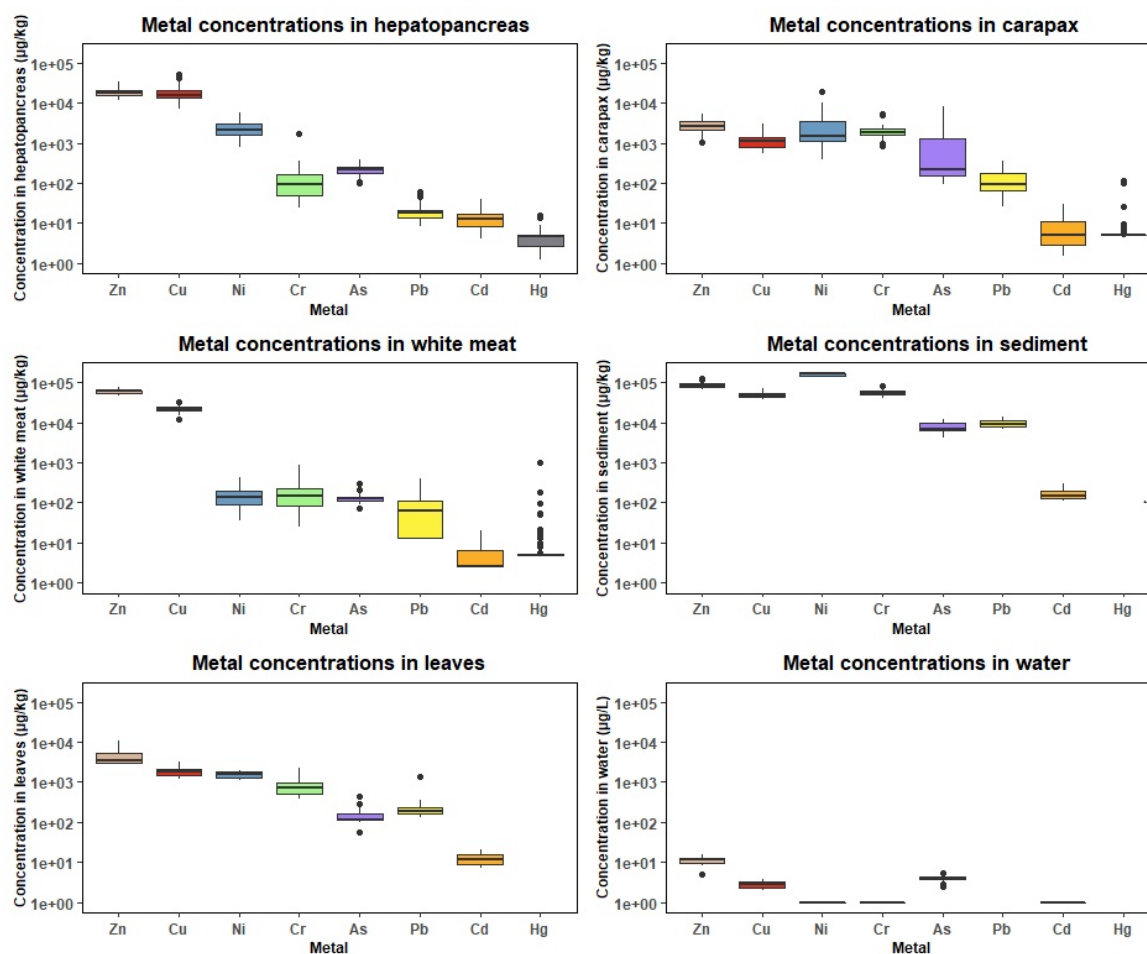

**Figure S1:** Distribution of metals in each compartment (µg/kg dw - µg/L). Note: Hg was not analyzed in the environmental matrices (sediment, leaves, water) and concentrations in water for Ni, Cr and Cd were <1 and Pb <LOD.

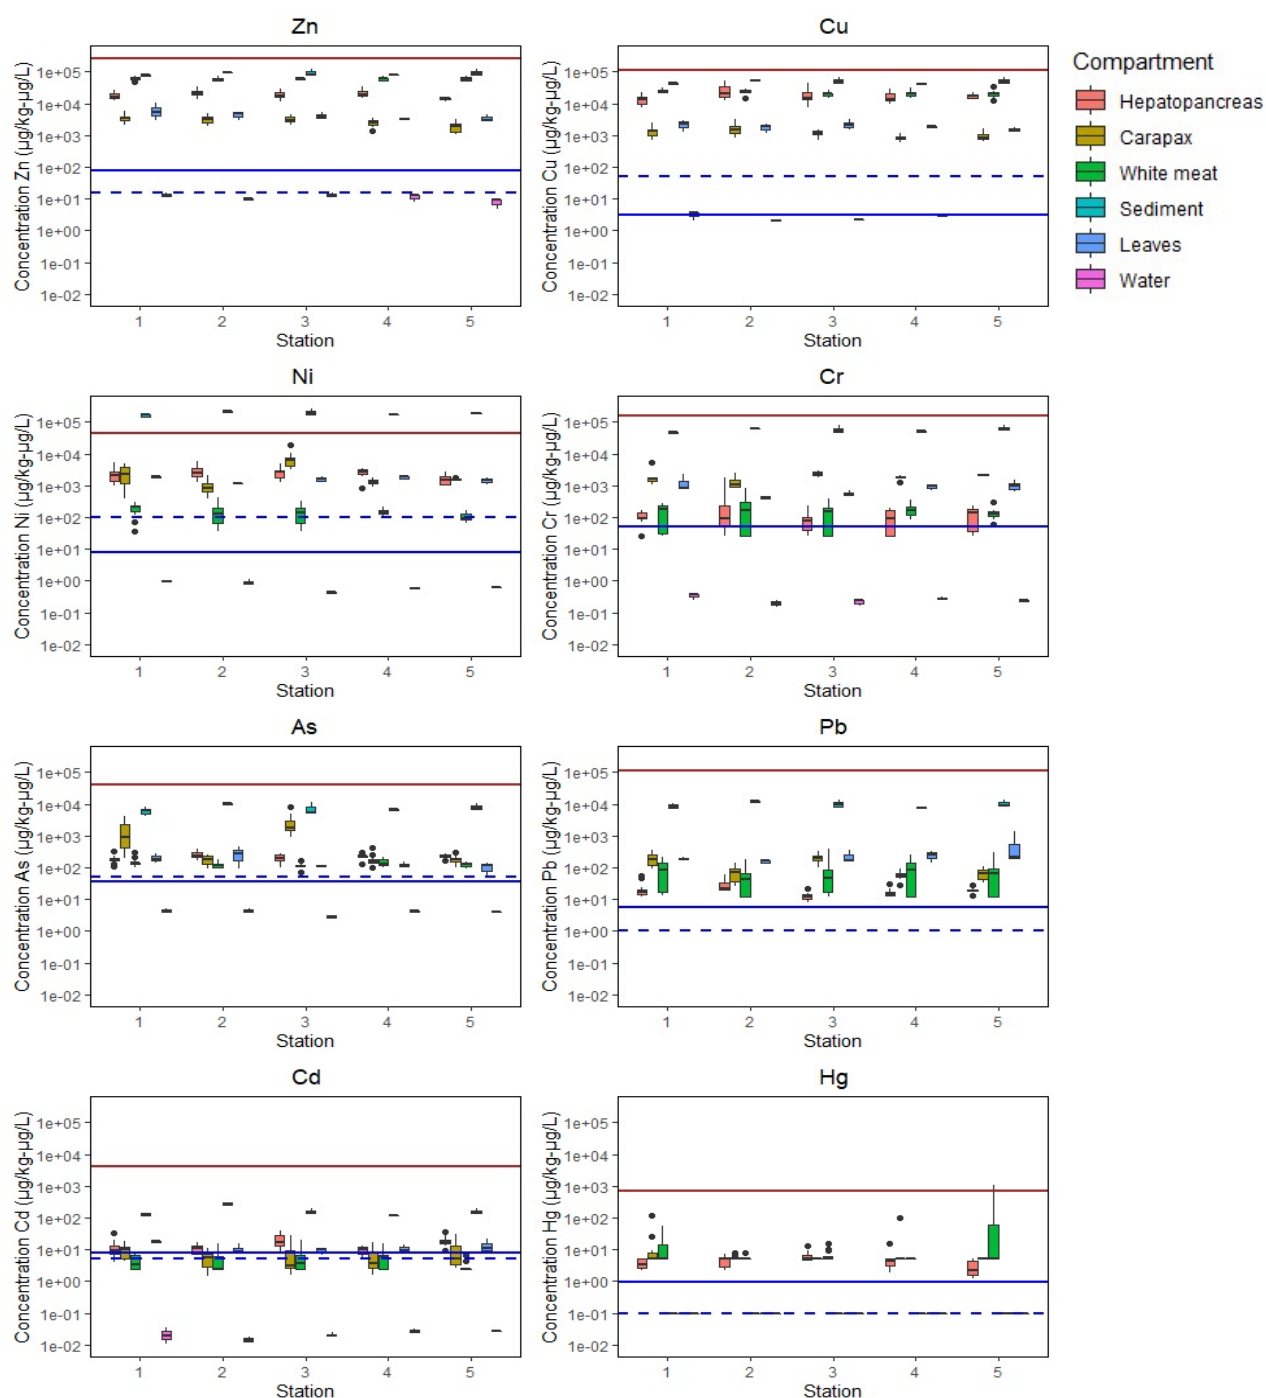

**Figure S2:** Boxplots with distribution of the metals in the compartments per station ( $\mu\text{g/kg dw}$  -  $\mu\text{g/L}$ ). Indication of PEL in brown, CCC in blue and the Ecuadorian national legislation threshold values for metals in water in dashed blue. Note: Hg was not analyzed in the environmental matrices (sediment, leaves, water) and concentrations in water for Pb were <LOD.

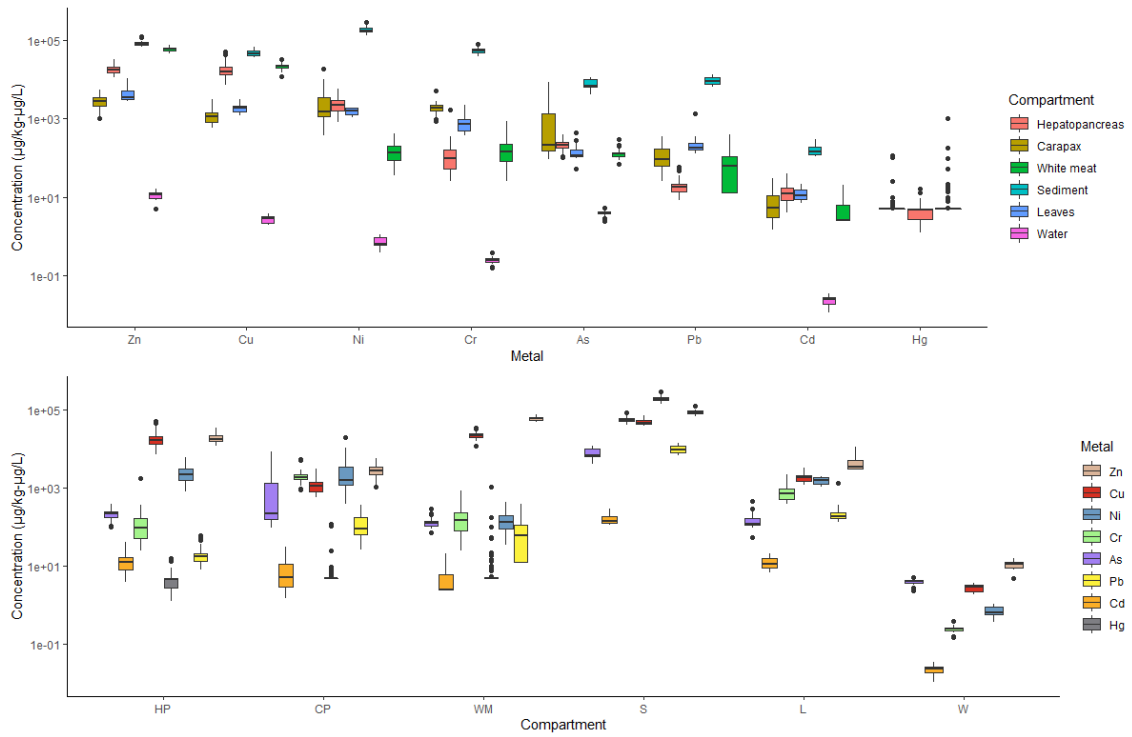

**Figure S3:** Boxplots with distribution of metals in each compartment (µg/kg dw - µg/L).

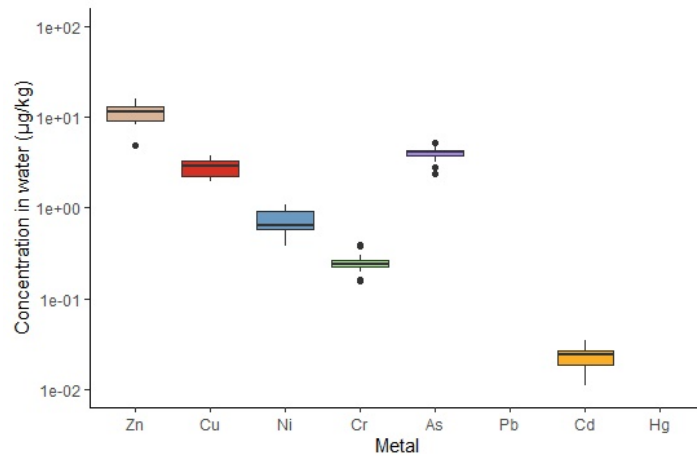

**Figure S4:** Boxplots with distribution of metals in water (µg/L).

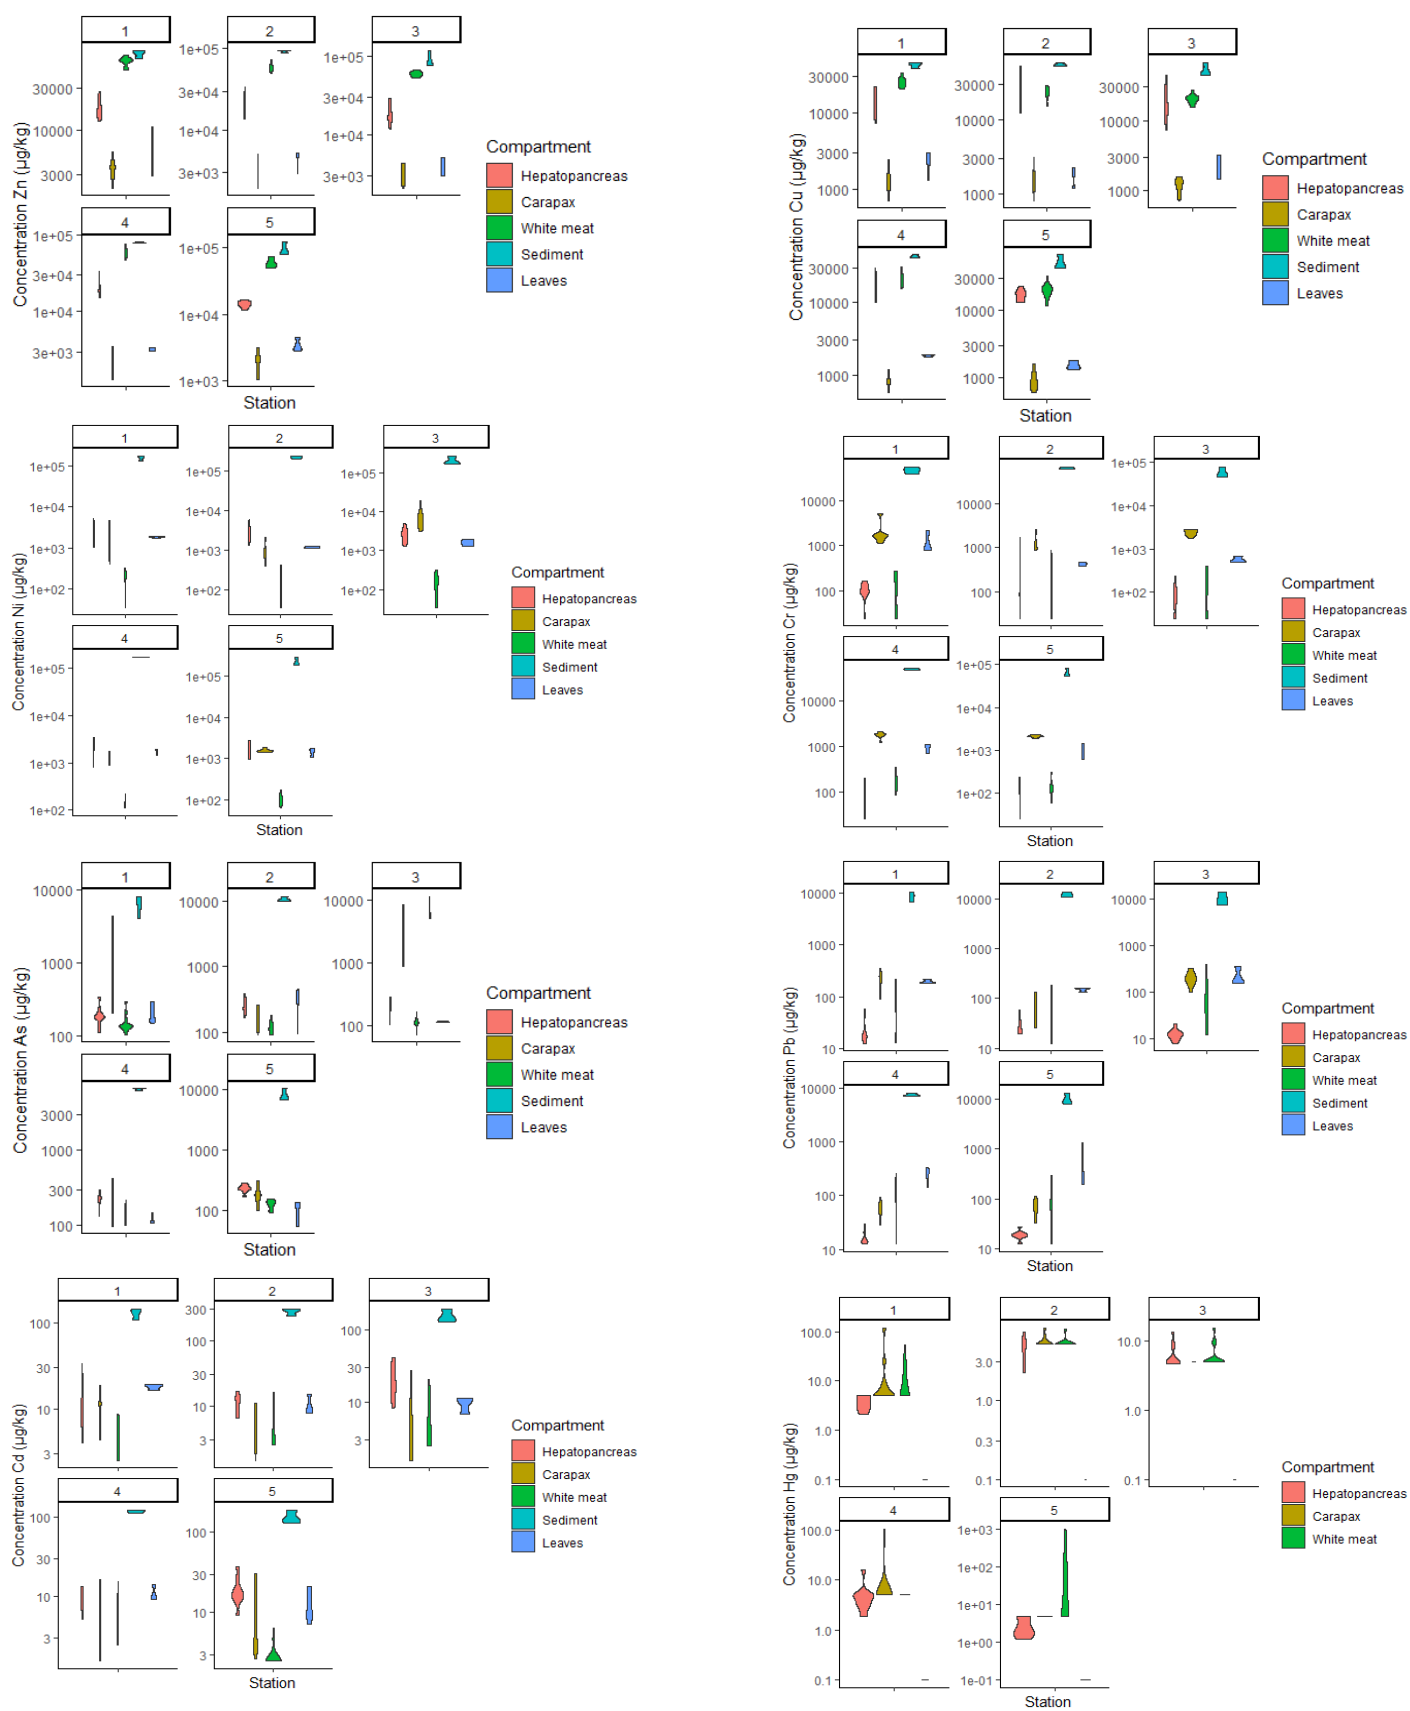

**Figure S5:** Violin plots with distribution of each metal in the different compartments (except for water) per station (1, 2, 3, 4 and 5 indicating each station) ( $\mu\text{g/kg dw}$ ).

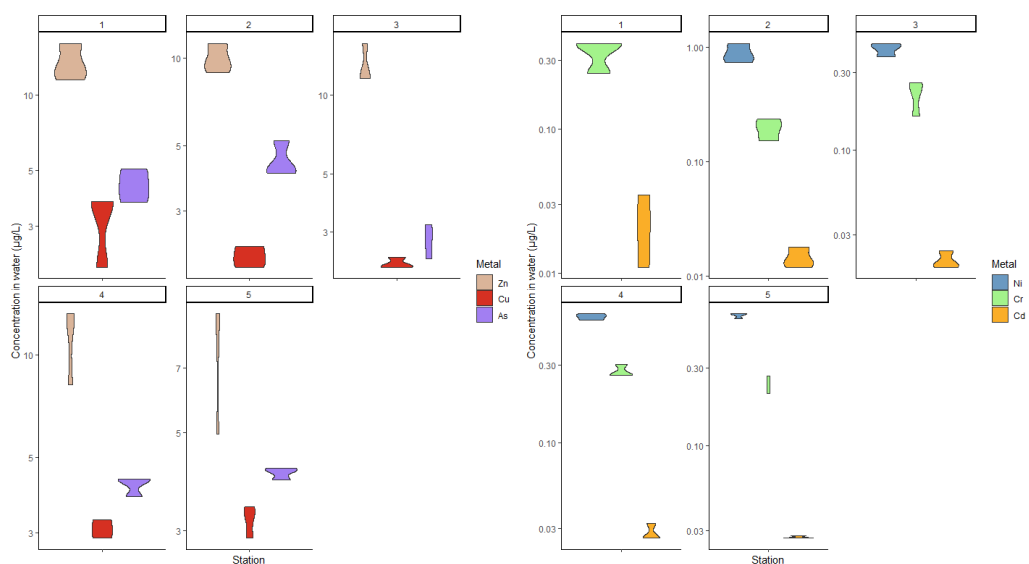

**Figure S6:** Violin plots with distribution of each metal in water per station (1, 2, 3, 4 and 5 indicating each station) ( $\mu\text{g/L}$ ).

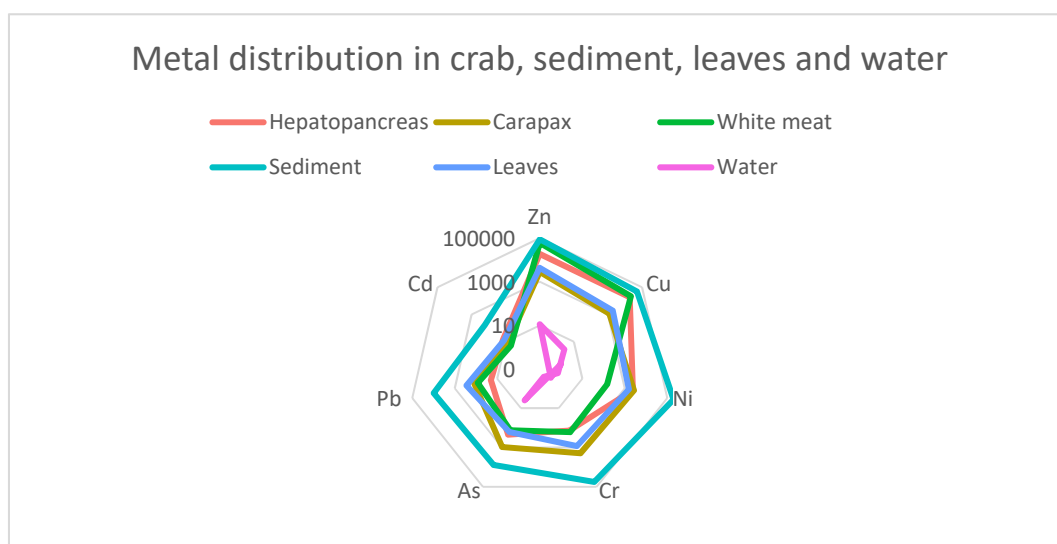

**Figure S7:** Radar plot showing the average distribution of the metals in the crab and environmental compartments ( $\mu\text{g/kg dw}$  -  $\mu\text{g/L}$ ).

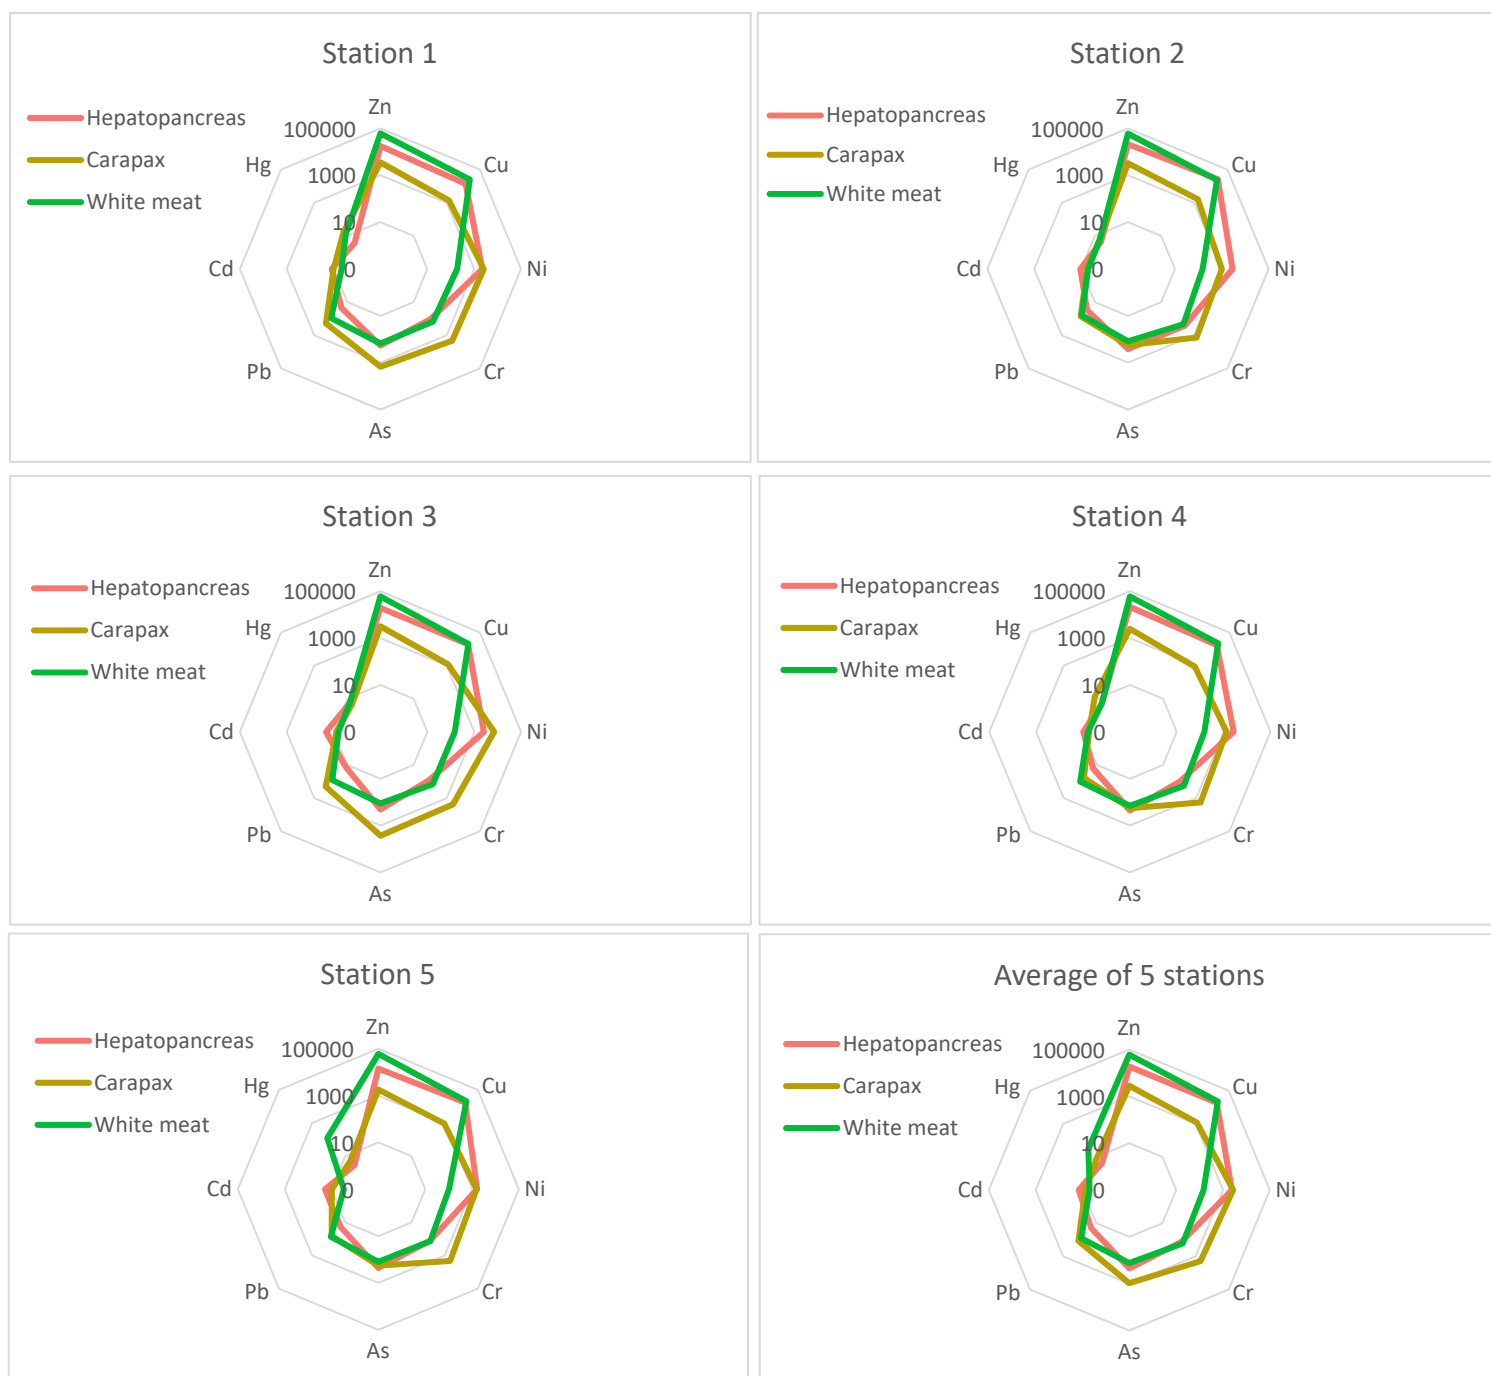

**Figure S8:** Radar plots per station showing the distribution of the metals in the crab compartments ( $\mu\text{g/kg dw}$ ).

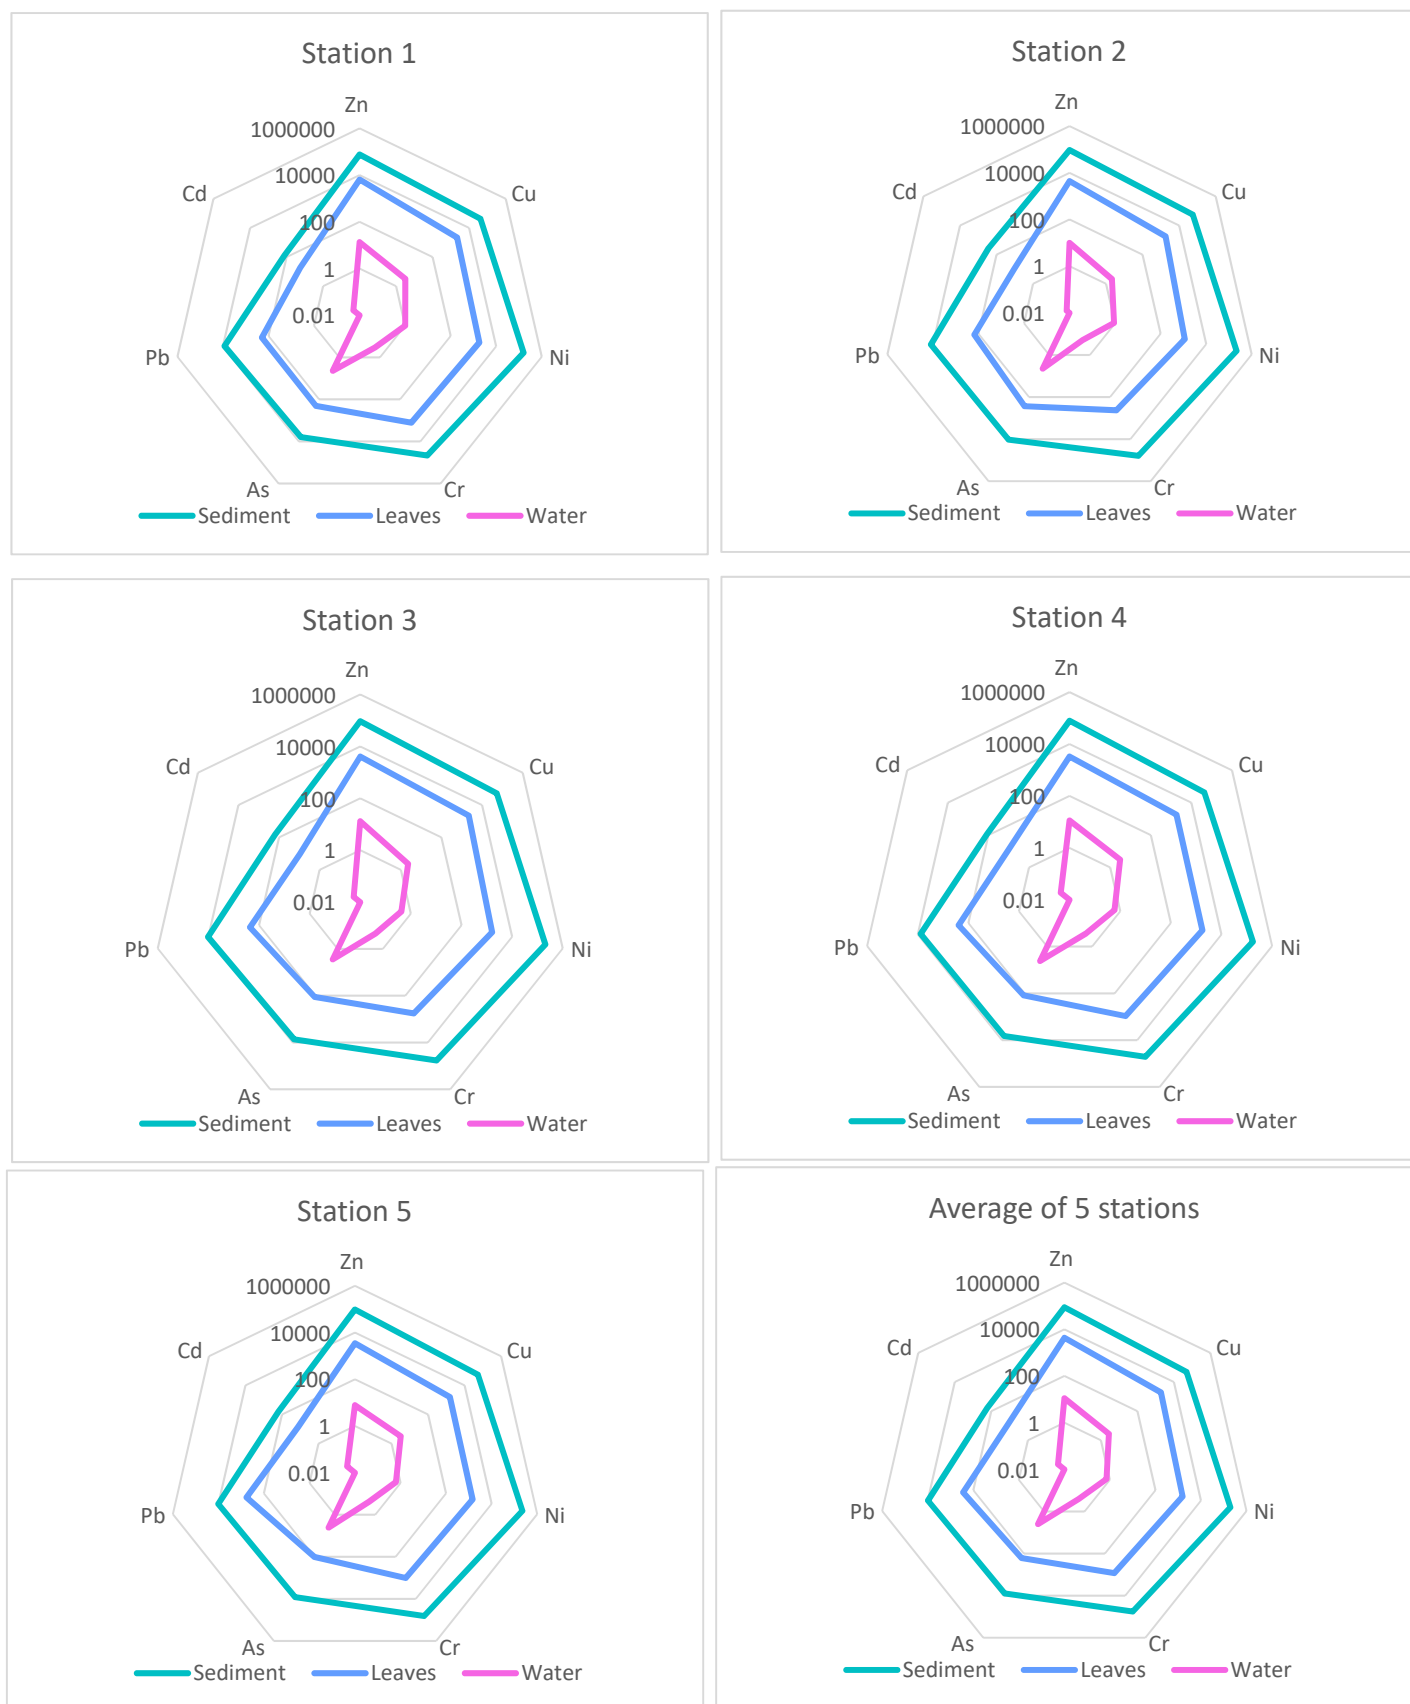

**Figure S9:** Radar plots per station showing the distribution of the metals in the environmental compartments (sediment and leaves  $\mu\text{g/kg dw}$  - water  $\mu\text{g/L}$ ).

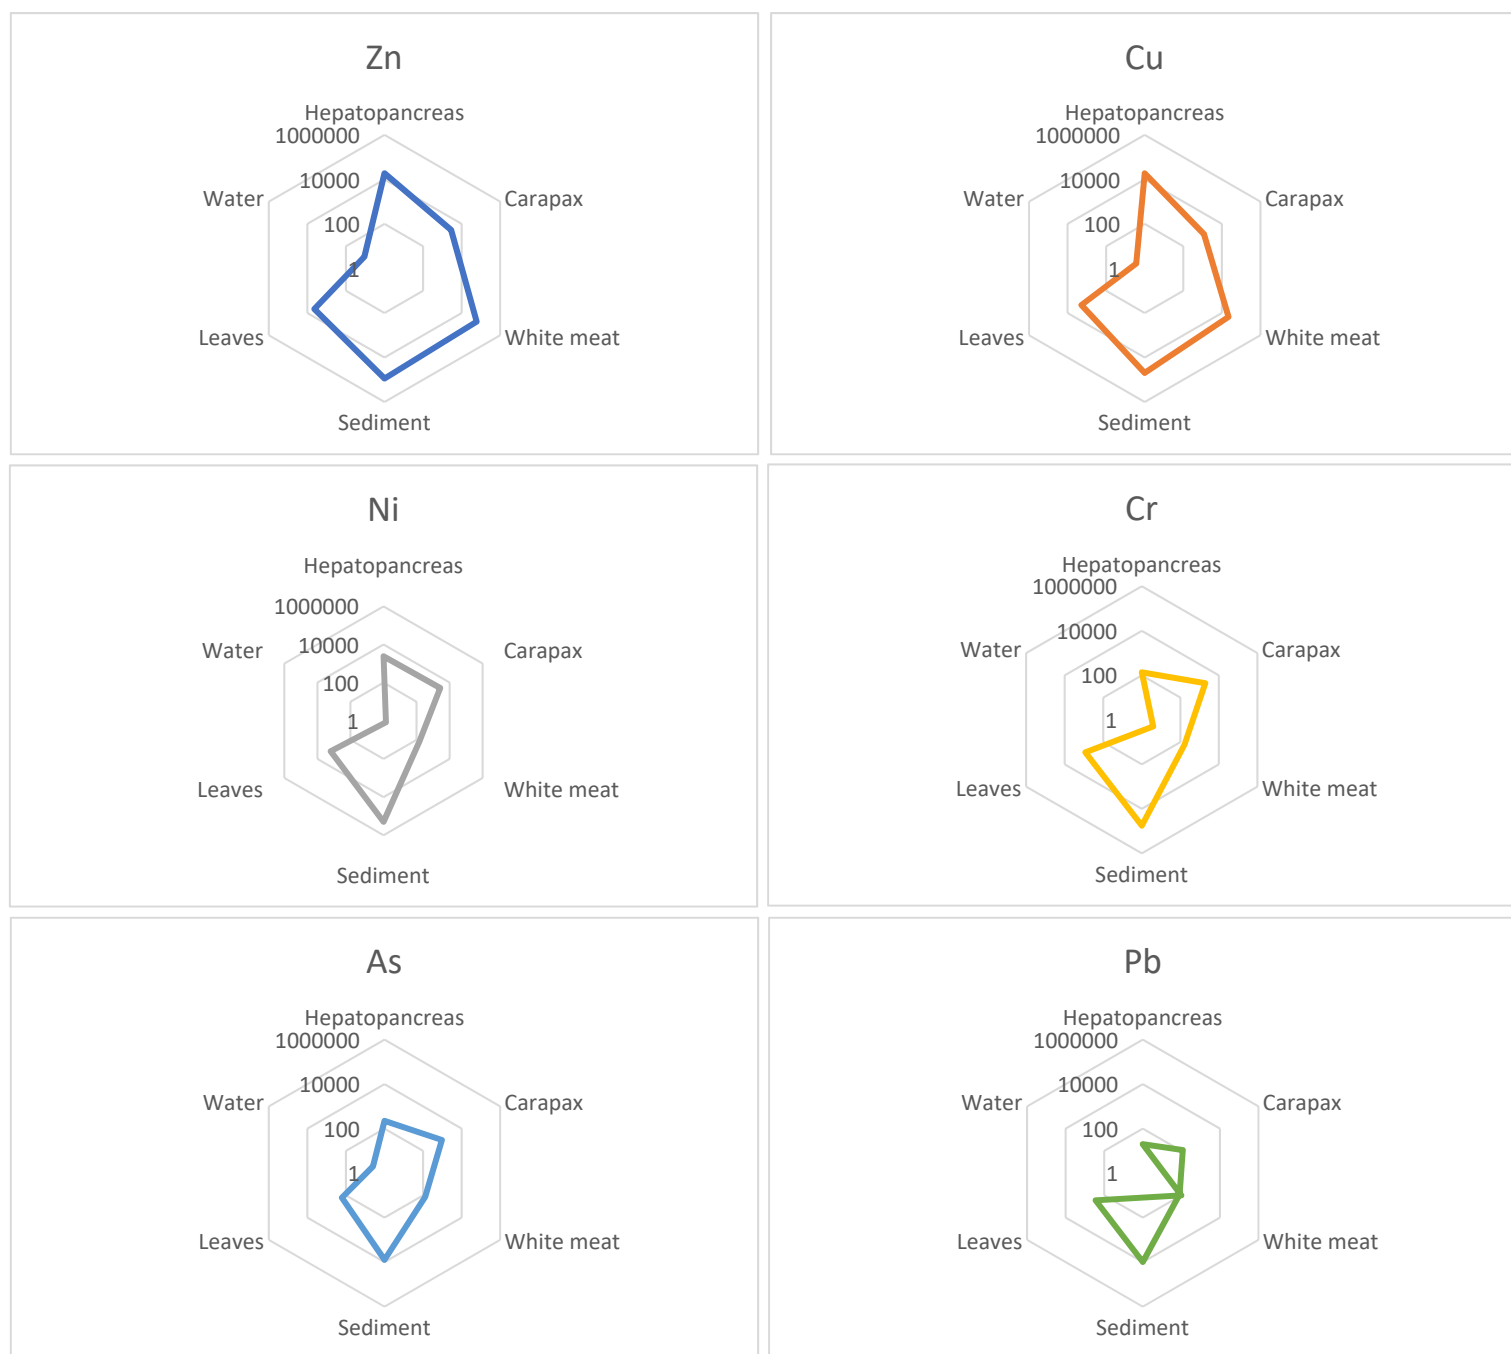

**Figure S10:** Radar plots per metal showing distribution in compartments (crab, sediment, and leaves  $\mu\text{g}/\text{kg}$  dw - water  $\mu\text{g}/\text{L}$ ).



**Table S1:** Crab codes, weight and carapax length per crab.

| Station | Crab Code | Weight (kg) | Carapax length (cm) | Station | Crab Code | Weight (kg) | Carapax length (cm) |
|---------|-----------|-------------|---------------------|---------|-----------|-------------|---------------------|
| S1      | 1/1       | 0.24        | 92                  | S4      | 4/1       | 0.21        | 82                  |
|         | 1/2       | 0.24        | 86                  |         | 4/2       | 0.25        | 85                  |
|         | 1/3       | 0.20        | 84                  |         | 4/3       | 0.21        | 85                  |
|         | 1/4       | 0.23        | 86                  |         | 4/4       | 0.26        | 93                  |
|         | 1/5       | 0.22        | 82                  |         | 4/5       | 0.16        | 77                  |
|         | 1/6       | 0.22        | 83                  |         | 4/6       | 0.21        | 81                  |
|         | 1/7       | 0.22        | 89                  |         | 4/7       | 0.22        | 85                  |
|         | 1/8       | 0.22        | 88                  |         | 4/8       | 0.17        | 79                  |
|         | 1/9       | 0.21        | 82                  |         | 4/9       | 0.15        | 79                  |
|         | 1/10      | 0.19        | 80                  |         | 4/10      | 0.22        | 79                  |
|         | 1/11      | 0.26        | 89                  |         | 4/11      | 0.19        | 78                  |
|         | 1/12      | 0.23        | 83                  |         | 4/12      | 0.15        | 73                  |
| S2      | 2/1       | 0.23        | 92                  | S5      | 5/1       | 0.22        | 83                  |
|         | 2/2       | 0.17        | 79                  |         | 5/2       | 0.27        | 87                  |
|         | 2/3       | 0.21        | 83                  |         | 5/3       | 0.23        | 84                  |
|         | 2/4       | 0.20        | 83                  |         | 5/4       | 0.21        | 80                  |
|         | 2/5       | 0.21        | 85                  |         | 5/5       | 0.19        | 83                  |
|         | 2/6       | 0.18        | 85                  |         | 5/6       | 0.20        | 78                  |
|         | 2/7       | 0.20        | 81                  |         | 5/7       | 0.17        | 83                  |
|         | 2/8       | 0.17        | 84                  |         | 5/8       | 0.20        | 88                  |
|         | 2/9       | 0.16        | 77                  |         | 5/9       | 0.19        | 76                  |
|         | 2/10      | 0.16        | 82                  |         | 5/10      | 0.19        | 77                  |
|         | 2/11      | 0.18        | 82                  |         | 5/11      | 0.21        | 81                  |
|         | 2/12      | 0.17        | 84                  |         | 5/12      | 0.20        | 84                  |
| S3      | 3/1       | 0.14        | 78                  |         |           |             |                     |
|         | 3/2       | 0.20        | 80                  |         |           |             |                     |
|         | 3/3       | 0.19        | 81                  |         |           |             |                     |
|         | 3/4       | 0.18        | 80                  |         |           |             |                     |
|         | 3/5       | 0.19        | 81                  |         |           |             |                     |
|         | 3/6       | 0.17        | 80                  |         |           |             |                     |
|         | 3/7       | 0.18        | 75                  |         |           |             |                     |
|         | 3/8       | 0.20        | 79                  |         |           |             |                     |
|         | 3/9       | 0.17        | 77                  |         |           |             |                     |
|         | 3/10      | 0.13        | 72                  |         |           |             |                     |
|         | 3/11      | 0.18        | 75                  |         |           |             |                     |
|         | 3/12      | 0.17        | 77                  |         |           |             |                     |

**Table S2:** Consumption data for health risk analysis (Source: the Division of Science, Research and Technology, New Jersey Department of Environmental Protection (NJDEP, 2002; Pflugh et al., 2011) and weight crabmeat and hepatopancreas per crab (g) analyzed in the current research.

| Consumption data       |      |      |                         |  |                                                 |  |                     |  |
|------------------------|------|------|-------------------------|--|-------------------------------------------------|--|---------------------|--|
| Meal per day           |      |      | Percentage of consumers |  | Weight crabmeat and hepatopancreas per crab (g) |  | Percentage of crabs |  |
| Every day              | 1    | 0.03 |                         |  | 26                                              |  | 0.02                |  |
| 2 to 3 times a week    | 0.36 | 0.23 |                         |  | 27                                              |  | 0.02                |  |
| Once a week            | 0.14 | 0.20 |                         |  | 28                                              |  | 0.07                |  |
| Twice a month          | 0.07 | 0.20 |                         |  | 33                                              |  | 0.08                |  |
| Once a month           | 0.03 | 0.12 |                         |  | 34                                              |  | 0.05                |  |
| Less than once a month | 0.02 | 0.13 |                         |  | 35                                              |  | 0.02                |  |
| Number crabs per meal  |      |      | Percentage of consumers |  | 36                                              |  | 0.08                |  |
| 1-3 crab               | 2    | 0.27 |                         |  | 37                                              |  | 0.05                |  |
| 4-6 crab               | 5    | 0.29 |                         |  | 38                                              |  | 0.10                |  |
| 7-10 crab              | 9    | 0.08 |                         |  | 39                                              |  | 0.19                |  |
| 11-15 crab             | 13   | 0.19 |                         |  | 40                                              |  | 0.08                |  |
| More 15 crab           | 18   | 0.08 |                         |  | 41                                              |  | 0.03                |  |
|                        |      |      |                         |  | 42                                              |  | 0.08                |  |
|                        |      |      |                         |  | 43                                              |  | 0.02                |  |
|                        |      |      |                         |  | 44                                              |  | 0.03                |  |
|                        |      |      |                         |  | 45                                              |  | 0.02                |  |
|                        |      |      |                         |  | 47                                              |  | 0.03                |  |
|                        |      |      |                         |  | 50                                              |  | 0.02                |  |

**Table S3:** Probabilistic Residue formulas

| Metal    | Probabilistic residue concentration(ug/kg)                                                                            |
|----------|-----------------------------------------------------------------------------------------------------------------------|
| Cr       | =RiskExtvalue(23,291;16,782;RiskName("Cr"))                                                                           |
| Ni       | =RiskLoglogistic(-11,239;211,29;4,328;RiskName("Ni"))                                                                 |
| Cu       | =RiskWeibull(1,7132;2002,9;RiskShift(2814,8);RiskName("Cu"))                                                          |
| Cd       | =RiskLognorm(1,4731;0,77435;RiskShift(0,37926);RiskName("Cd"))                                                        |
| Hg       | =RiskInvgauss(1,5216;0,24118;RiskShift(0,78834);RiskName("Hg"))                                                       |
| Zn       | =RiskLoglogistic(4429,4;5277,8;7,3177;RiskName("Zn"))                                                                 |
| As       | =RiskLaplace(35,1632;7,1264;RiskName("As"))                                                                           |
| As Inorg | =RiskLaplace(35,1632;7,1264;RiskName("As"))*RiskDiscrete(I25:I27;J25:J27;RiskName("Discrete distribution In-As"))/100 |
| Pb       | =RiskGamma(0,70949;15,127;RiskShift(2,6332);RiskName("Pb"))                                                           |

**Table S4:** Metal concentrations in crab compartments and environmental compartments. LOD: Limit of detection

|    | HP (mg/kg dw) |            | CP (mg/kg dw) |            | WM (mg/kg dw) |            | S (mg/kg dw) |         | L (mg/kg dw) |            | W (µg/L)  |                 |
|----|---------------|------------|---------------|------------|---------------|------------|--------------|---------|--------------|------------|-----------|-----------------|
|    | Average       | Range      | Average       | Range      | Average       | Range      | Average      | Range   | Average      | Range      | Average   | Range           |
| Zn | 19±5          | 12-34      | 3±1           | 1-6        | 60±7          | 48-75      | 88±16        | 67-126  | 4±2          | 3-11       | 5-16      | 0.005-0.02      |
| Cu | 19±9          | 7-52       | 1±0.5         | 1-3        | 22±4          | 12-33      | 50±10        | 37-70   | 2±1          | 1-3        | 2-4       | 0.002-0.004     |
| Ni | 2±1           | 1-6        | 3±3           | 0.4-19     | 0.1±0.1       | 0.04-0.4   | 196±41       | 137-294 | 2±0.3        | 1-2        | 0.4-1.1   | 0.0004-0.001    |
| As | 0.1±0.2       | 0.03-2     | 2±0.8         | 0.9-5      | 0.2±0.1       | 0.03-0.9   | 8±2          | 4-12    | 0.2±0.1      | 0.1-0.4    | 2.4-5.2   | 0.002-0.005     |
| Cd | 0.2±0.1       | 0.1-0.4    | 1±2           | 0.1-8      | 0.1±0.04      | 0.07-0.3   | 0.17±0.06    | 0.1-0.3 | 0.01±0.005   | 0.007-0.02 | 0.01-0.04 | 0.00001-0.00004 |
| Pb | 0.02±0.01     | 0.01-0.06  | 0.1±0.1       | 0.03-0.4   | 0.1±0.1       | 0.01-0.4   | 10±2         | 7-14    | 0.3±0.3      | 0.1-1.3    | <LOD      | <LOD            |
| Hg | 0.01±0.008    | 0.004-0.04 | 0.008±0.006   | 0.001-0.03 | 0.005±0.004   | 0.003-0.02 | NA           | NA      | NA           | NA         | NA        | NA              |
| Cr | 0.004±0.003   | 0.001-0.02 | 0.009±0.02    | 0.005-0.1  | 0.03±0.1      | 0.01-1     | 57±12        | 39-83   | 0.8±0.5      | 0.4-2.2    | 0.2-0.4   | 0.0002-0.0004   |

**Table S5:** Limit of detection (LOD) and limit of quantification (LOQ) levels for the different compartments.

| Metal     | WATER      |            | LEAVES      |             | SEDIMENT    |             | CRAB        |             |
|-----------|------------|------------|-------------|-------------|-------------|-------------|-------------|-------------|
|           | LOD (µg/L) | LOQ (µg/L) | LOD (µg/kg) | LOQ (µg/kg) | LOD (µg/kg) | LOQ (µg/kg) | LOD (µg/kg) | LOQ (µg/kg) |
| <b>Cr</b> | 0.02       | 0.06       | 0.17        | 0.56        | 1.68        | 5.60        | 0.17        | 25.00       |
| <b>Ni</b> | 0.04       | 0.14       | 0.43        | 1.43        | 4.29        | 14.30       | 0.43        | 35.00       |
| <b>Cu</b> | 0.04       | 0.12       | 0.35        | 1.17        | 3.51        | 11.70       | 0.35        | 1.17        |
| <b>As</b> | 0.01       | 0.04       | 0.13        | 0.42        | 1.25        | 4.17        | 0.13        | 0.42        |
| <b>Cd</b> | 0.00       | 0.01       | 0.03        | 0.11        | 0.33        | 1.10        | 0.03        | 2.50        |
| <b>Pb</b> | 0.00       | 0.00       | 0.01        | 0.05        | 0.14        | 0.47        | 0.01        | 12.50       |
| <b>Hg</b> | 0.03       | 0.10       | 0.30        | 1.00        | 3.00        | 10.00       | 0.30        | 5.00        |
| <b>Zn</b> | 1.76       | 5.87       | 18.00       | 60.00       | 176.00      | 586.67      | 18.00       | 60.00       |

**Table S6:** Recovery data for sediment reference materials.

| Element                     | BCR 277 (estuarine sediment) <sup>1</sup> |                                    | CRM 052 (Loamy clay ) <sup>2</sup> |                                    |
|-----------------------------|-------------------------------------------|------------------------------------|------------------------------------|------------------------------------|
|                             | Recovery (%)                              | Uncertainty reference material (%) | Recovery (%)                       | Uncertainty reference material (%) |
| Cd 114                      | 78                                        | 11                                 | 136                                | 3                                  |
| Cr-KED 52                   | 85                                        | 7                                  | 121                                | 1                                  |
| Ni-KED 58                   | 212                                       | 6                                  | 124                                | 3                                  |
| Zn-KED 64                   | 77                                        | 11                                 | 0                                  | 0                                  |
| Cu-KED 65                   | 84                                        | 11                                 | 86                                 | 2                                  |
| As-KED 75                   | 89                                        | 10                                 | 102                                | 2                                  |
| <sup>1</sup> (Evisa, 2010a) |                                           |                                    |                                    |                                    |
| <sup>2</sup> (Evisa, 2010b) |                                           |                                    |                                    |                                    |

**Table S7:** Recovery data for crab reference material.

| Element                     | TORT-2 (lobster hepatopancreas) <sup>1</sup> |                                    |
|-----------------------------|----------------------------------------------|------------------------------------|
|                             | Recovery (%)                                 | Uncertainty reference material (%) |
| Pb-totaal 208               | 95                                           | 37                                 |
| As-KED 75                   | 77                                           | 8                                  |
| Ni-KED 58                   | 93                                           | 8                                  |
| Cu-KED 65                   | 83                                           | 9                                  |
| Cr-KED 53                   | 105                                          | 19                                 |
| Cd-KED 114                  | 74                                           | 2                                  |
| Hg 202                      | 102                                          | 22                                 |
| Zn                          | 95                                           | 3                                  |
| <sup>1</sup> (Evisa, 2010c) |                                              |                                    |

**Table S8:** In-situ measurements at sample sites. DO: Dissolved oxygen, ND: Not detected, BDL: Below detection limit.

| Sample ID | Conductivity<br>( $\mu\text{S}/\text{cm}$ ) | pH (-) | Temperature<br>( $^{\circ}\text{C}$ ) | DO<br>( $\text{mg}/\text{L}$ ) | DO Sat<br>(%) | Nitrate-N<br>( $\text{mg}/\text{L}$ ) | Nitrite-N<br>( $\text{mg}/\text{L}$ ) | Ammonium-N<br>( $\text{mg}/\text{L}$ ) | Orthophosphate<br>( $\text{mg}/\text{L}$ ) |
|-----------|---------------------------------------------|--------|---------------------------------------|--------------------------------|---------------|---------------------------------------|---------------------------------------|----------------------------------------|--------------------------------------------|
| 1A        | 36.6                                        | 7.42   | 25.8                                  | 5.65                           | 67.5          | ND                                    | ND                                    | ND                                     | ND                                         |
| 1B        | 34.7                                        | 7.3    | 25.8                                  | 3.83                           | 47.2          | BDL                                   | 0.052                                 | 0.272                                  | 1.46                                       |
| 1C        | 26.1                                        | 7.39   | 26.3                                  | 4.66                           | 57.4          | ND                                    | ND                                    | ND                                     | ND                                         |
| 2A        | 6.23                                        | 7.53   | 26.5                                  | 5.11                           | 63.4          | BDL                                   | 0.041                                 | 0.122                                  | 0.7                                        |
| 2B        | 13.41                                       | 7.4    | 25.9                                  | 4.83                           | 59.4          | ND                                    | ND                                    | ND                                     | ND                                         |
| 2C        | 12.68                                       | 7.37   | 25.6                                  | 4.23                           | 51.7          | BDL                                   | 0.036                                 | 0.039                                  | 0.69                                       |
| 3A        | 10.96                                       | 7.48   | 26.5                                  | 6.68                           | 83.3          | 0.9                                   | 0.029                                 | 0.051                                  | 0.57                                       |
| 3B        | 13.69                                       | 7.45   | 26.4                                  | 6.36                           | 78.8          | 1.3                                   | 0.042                                 | 0.116                                  | 0.64                                       |
| 3C        | 15.94                                       | 7.45   | 26.3                                  | 6.36                           | 87.8          | 0.6                                   | 0.045                                 | 0.146                                  | 0.61                                       |
| 4A        | 32.3                                        | 7.64   | 26.9                                  | 6.96                           | 87.4          | BDL                                   | 0.022                                 | 0.002                                  | 0.36                                       |
| 4B        | 33                                          | 7.61   | 26.7                                  | 6.86                           | 85.5          | BDL                                   | 0.026                                 | 0.068                                  | 0.3                                        |
| 4C        | 34.6                                        | 7.67   | 26.5                                  | 6.97                           | 86.6          | 0.6                                   | 0.023                                 | 0.008                                  | 0.31                                       |
| 5A        | 30.8                                        | 7.63   | 26.6                                  | 6.7                            | 83.3          | BDL                                   | 0.025                                 | 0.055                                  | 0.34                                       |
| 5B        | 30.7                                        | 7.44   | 26.7                                  | 5.8                            | 72.3          | BDL                                   | 0.04                                  | BDL                                    | 0.31                                       |
| 5C        | 30.8                                        | 7.41   | 26.7                                  | 5.48                           | 68.4          | 0.4                                   | 0.054                                 | 0.01                                   | 0.32                                       |

## Equations

A BSAF value of  $<1$  indicates a low bioavailability of the metal and no bio-accumulation in the crab. A BSAF of  $1 < \text{BSAF} < 2$  indicates that the organism is a micro-concentrator, and a BSAF value  $> 2$  indicates that the organism is a macro-concentrator.

The factor of 1.5 in  $I_{\text{geo}}$  is introduced to minimize the effect of possible variations in the background or control values which may be attributed to lithogenic variations in the sediment (Barbieri, 2016; Okedeyi et al., 2014). According to the abundance data in the Earth's Crust of Krauskopf and Bird (1995) the  $B_n$  values were Zn:70, Ni:75, Cr:100, Pb:13, Cu:55, Cd:0.2, and As:1.8 mg/kg (Hasan et al., 2013; Krauskopf & Bird, 1995). Muller (1979) has defined seven classes of Geo-accumulation Index ranging from Class 0 ( $I_{\text{geo}} < 0$ , unpolluted) to Class 6 ( $I_{\text{geo}} > 5$ , extremely polluted) (Muller, 1979).

It is reported by Samara et al. that a value of  $HQ < 1$  refers to unpolluted sites with no or reversible effect on aquatic organisms, whereas a value of  $HQ > 1$ , indicates a potential ecological hazard,  $1 < HQ < 2$  indicates low pollutant load with no acute danger for organisms;  $2 < HQ < 10$  indicates intermediate pollution that can lead to fatal effects to sensitive organisms and finally  $HQ > 10$  signifies high pollution with effects on the reduction of benthic organism diversity (Nabelkova & Kominkova, 2012; Samara et al., 2020; Sample et al., 1996).
